# Supplementary material for: Evolution of fertilization ability in obligatorily outcrossing populations of Caenorhabditis elegans
Source: PeerJ journal article supplement (doi:10.7717/peerj.15825), 2023-09-08

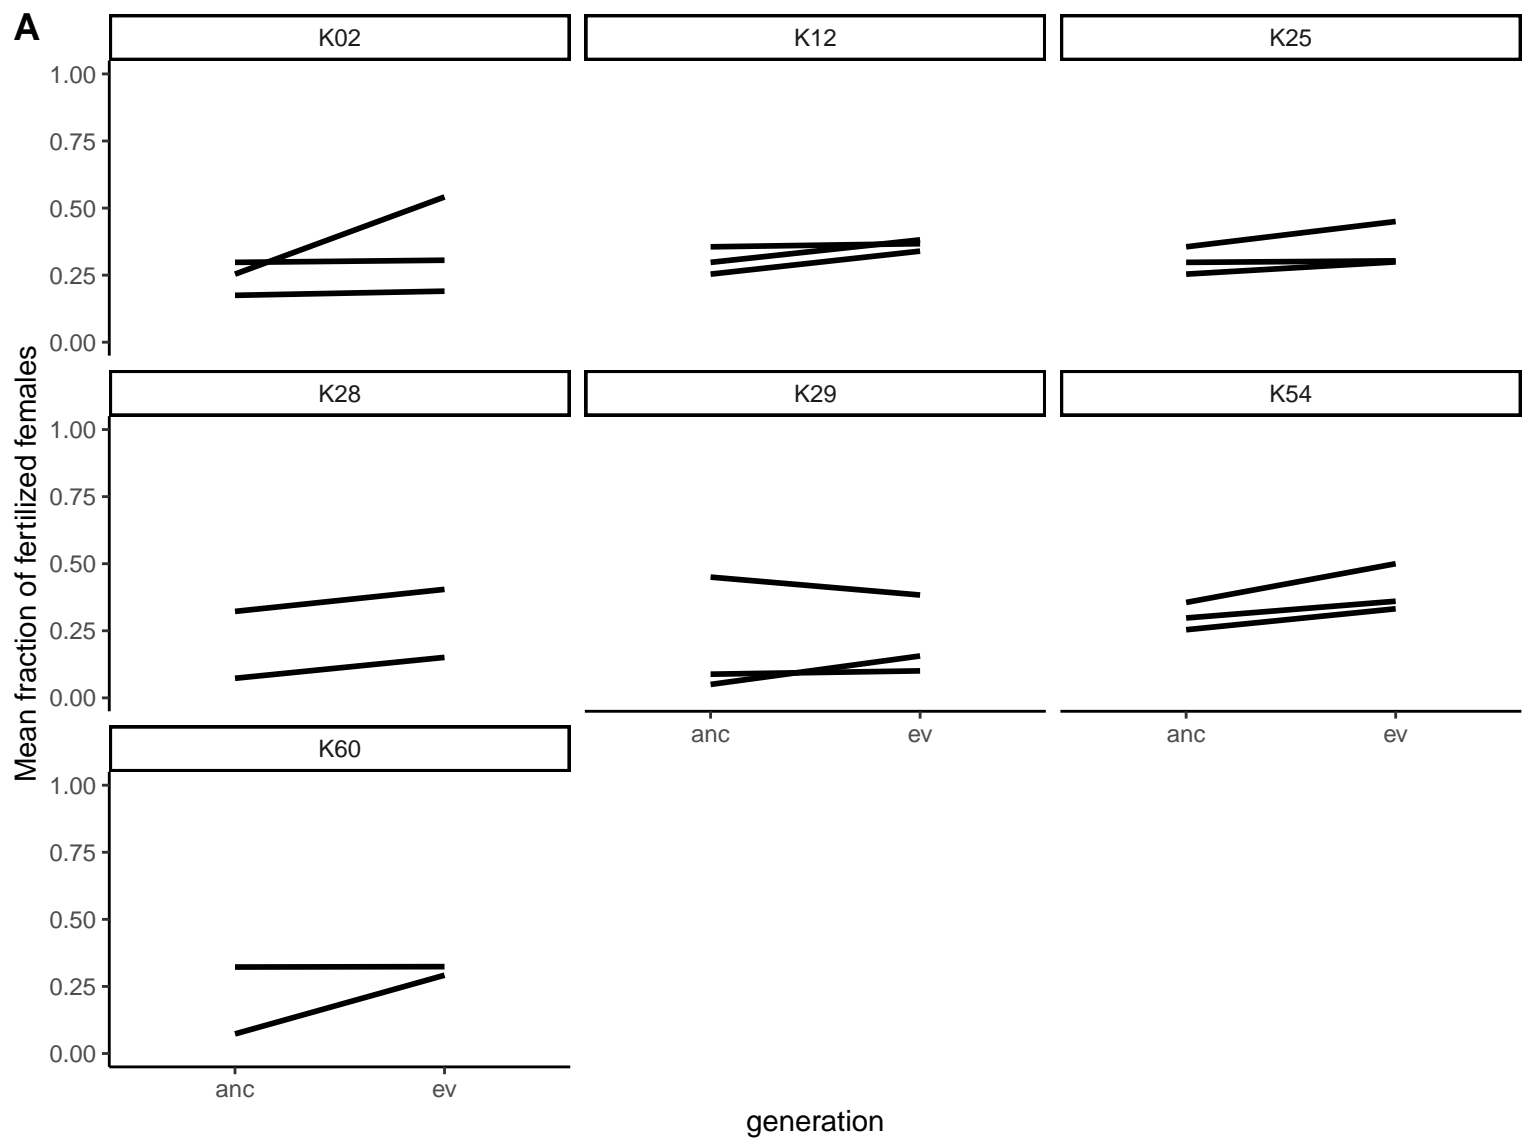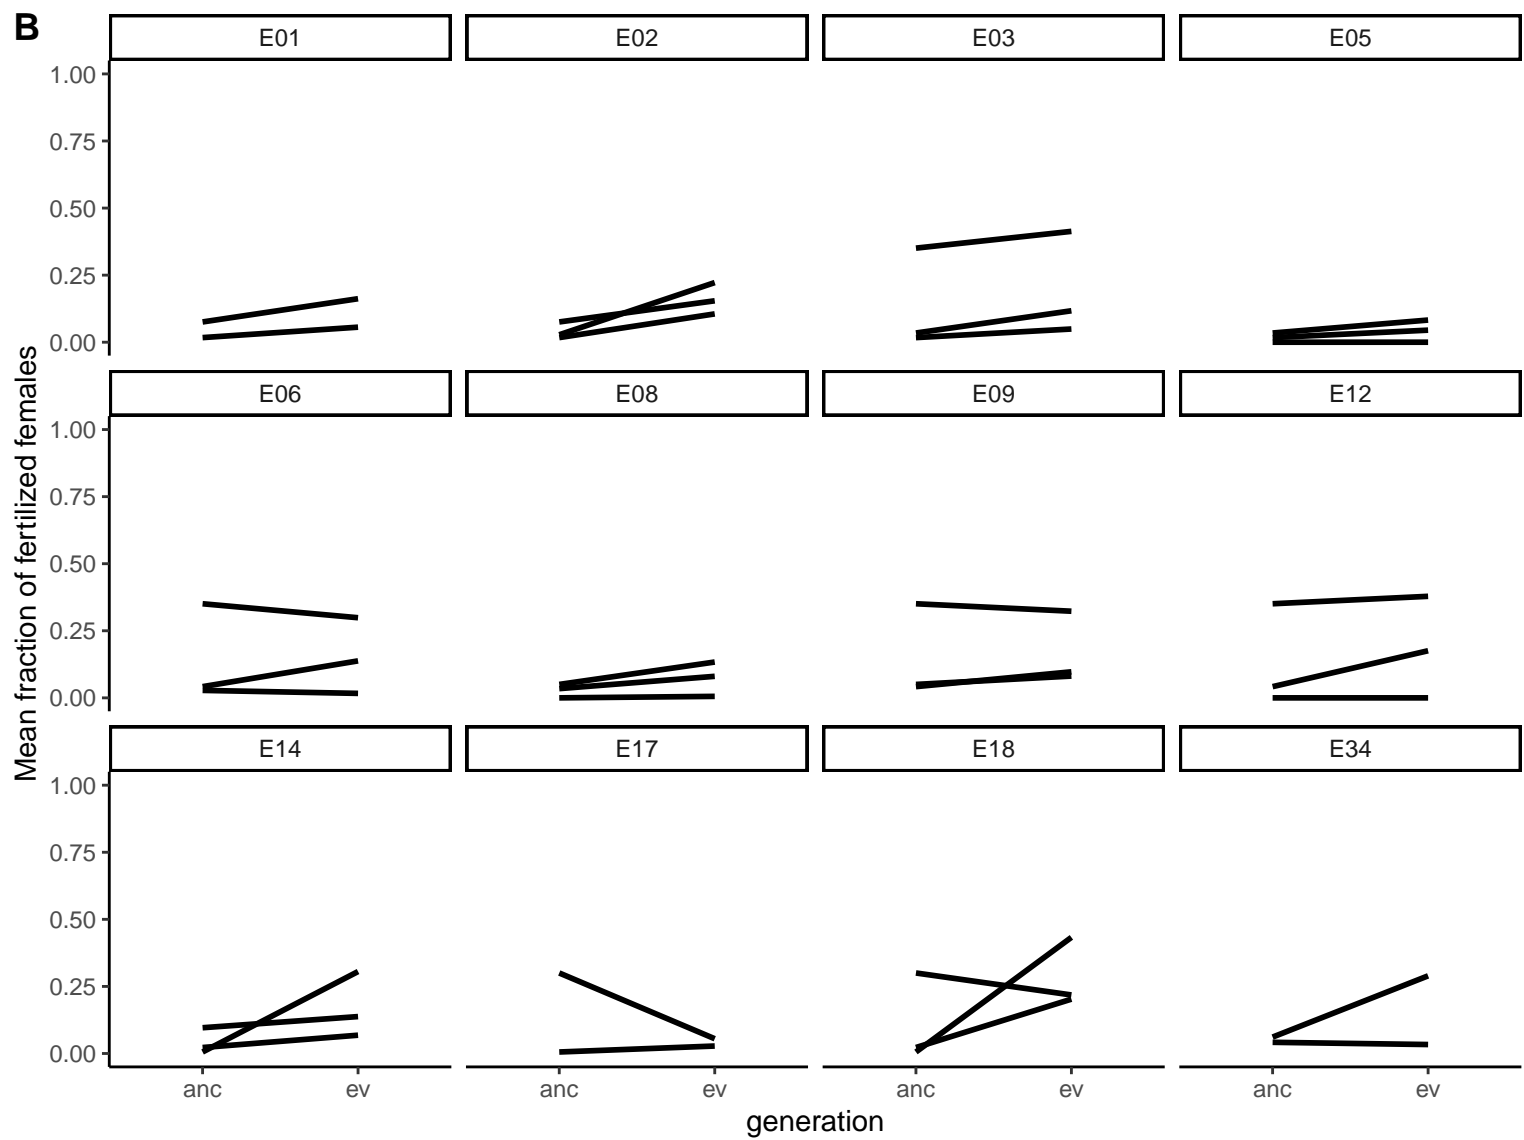

Supplement: Supplement2.pdf [file Supplement2.pdf]
